# Supplementary material for: Component analysis and anti-pulmonary fibrosis effects of Rosa sterilis juice
Source: Royal Society of Chemistry journal article supplement (doi:10.1039/d2fo02758e), 2022-01-01

Supplement Figure S1 Total ion chromatogram of RSJ

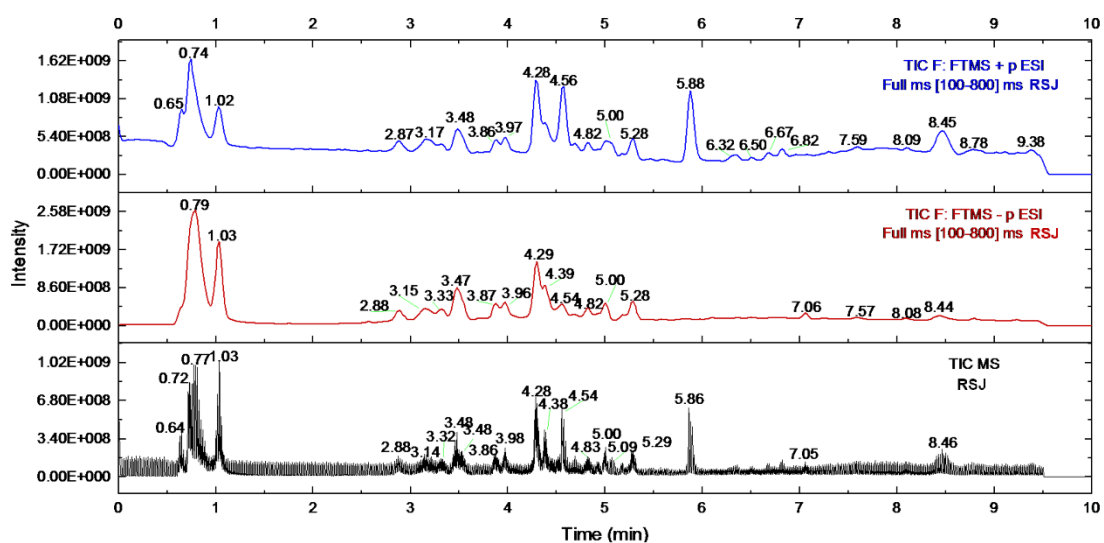

Supplementary Figure S2 The scavenging rate of RSJ on DPPH (A), ABTS (B) and  $\cdot$ OH (C) free radicals.

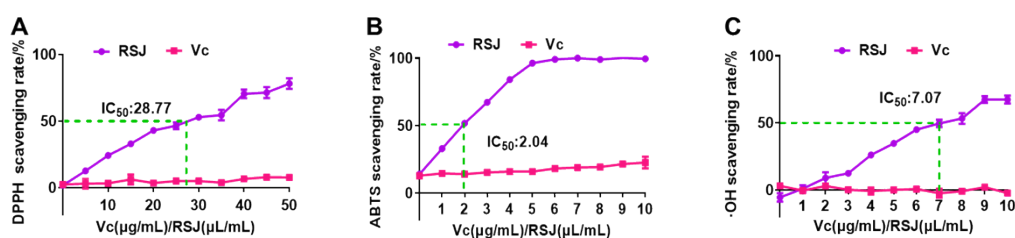

Supplement: d2fo02758e1.pdf [file d2fo02758e1.pdf]
