# Supplementary material for: Component analysis and anti-pulmonary fibrosis effects of Rosa sterilis juice
Source: Royal Society of Chemistry journal article supplement (doi:10.1039/d2fo02758e), 2022-01-01
Supplement: d2fo02758e2.xlsx [file d2fo02758e2.xlsx]

## Sheet: S1
Supplementary Table 1: Mobile phase and elution procedure used in HPLC
Vitamin C
Mobile phase	A: 0.68% potassium dihydrogen phosphate and 0.091% cetyltrimethylammonium bromide	B: 100% methanol
Mobile phase A and mobile phase B were mixed at a ratio of 98 : 2 and used after ultrasonication
Gallic acid
Mobile phase	A: 0.1% formic acid	B: Acetonitrile
Time (min)
0	95	5
2	95	5
7	77	23
7.1	95	5
10	95	5
Catechin, caffeic acid, rutin, astilbin,quercetin, kaempferol
Mobile phase	A: 0.1% formic acid	B: Acetonitrile
Time (min)
0	90	10
2	90	10
18	65	35
22	65	35
25	90	90
28	90	90

## Sheet: S2
Vitamin C							Vitamin C
Concentration(μg/mL)	Area							RT (min)	Area	Concentration(μg/mL)	Calculated concentration (mg/mL)
4.11988	126098						Sample 1	8.891	1767782	50.9771	11.3282
10.2997	337416						Sample 2	9.012	1773697	51.144	11.3653
20.5994	693114						Sample 3	9.091	1758347	50.7109	11.2691
41.1988	1394578						Sample 4	9.062	1755997	50.6446	11.2544
102.997	3591071						Sample 5	9.031	1756839	50.6684	11.2596
205.994	7276870						Sample 6	9.02	1759966	50.7566	11.2792
										Average value	11.2927
										SD	0.0443633
Gallic acid							Gallic acid
Concentration(ng/μL)	Area							RT (min)	Area	Concentration(ng/μL)	Calculated concentration(μg/mL)
0	0						Sample 1	3.541	473.168	9.53743	9.53743
5	266.05						Sample 2	3.529	495.895	9.9971	9.9971
20	1101.04						Sample 3	3.529	490.192	9.88174	9.88174
50	2285.12						Sample 4	3.529	494.07	9.96019	9.96019
100	4990.5						Sample 5	3.531	496.959	10.0186	10.0186
150	7435.8						Sample 6	3.534	498.2	10.0437	10.0437
										Average value	9.90646
										SD	0.189374
Catechin							Catechin
Concentration(ng/μL)	Area							RT (min)	Area	Concentration(ng/μL)	Calculated concentration(μg/mL)
0	0						Sample 1	6.127	3270.77	588.425	588.425
5	18.16						Sample 2	6.108	3262.48	586.937	586.937
20	112.57						Sample 3	6.115	3253.34	585.296	585.296
50	281.27						Sample 4	6.125	3255.72	585.723	585.723
100	541.37						Sample 5	6.103	3468.65	623.951	623.951
150	810.82						Sample 6	6.102	3241.46	583.162	583.162
200	1078.4									Average value	592.249
250	1420.9									SD	15.6294
Caffeic acid							Caffeic acid
Concentration(ng/μL)	Area							RT (min)	Area	Concentration(ng/μL)	Calculated concentration(μg/mL)
0	0						Sample 1	7.252	796.485	23.3645	23.3645
5	120.373						Sample 2	7.605	522.075	15.6496	15.6496
20	710.815						Sample 3	7.617	514.142	15.4266	15.4266
50	1804.72						Sample 4	7.625	437.14	13.2617	13.2617
100	3526.41						Sample 5	7.604	454.973	13.7631	13.7631
150	5199.6						Sample 6	7.602	439.403	13.3254	13.3254
200	6809.05									Average value	15.7985
250	9118.5									SD	3.84964
Rutin							Rutin
Concentration(ng/μL)	Area							RT (min)	Area	Concentration(ng/μL)	Calculated concentration(μg/mL)
0	0						Sample 1	11.594	295.287	36.5551	36.5551
5	28.9229						Sample 2	11.577	333.2	41.3205	41.3205
20	168.688						Sample 3	11.588	313.167	38.8026	38.8026
50	418.837						Sample 4	11.589	295.23	36.548	36.548
100	813.014						Sample 5	11.569	334.329	41.4625	41.4625
150	1196.07						Sample 6	11.569	337.533	41.8652	41.8652
200	1567.74									Average value	39.4257
250	2008.2									SD	2.47384
Astilbin							Astilbin
Concentration(ng/μL)	Area							RT (min)	Area	Concentration(ng/μL)	Calculated concentration(μg/mL)
0	0						Sample 1	12.162	219.639	11.4145	11.4145
5	72.2181						Sample 2	12.149	226.647	11.7604	11.7604
20	415.592						Sample 3	12.16	216.048	11.2372	11.2372
50	1042.83						Sample 4	12.161	220.325	11.4484	11.4484
100	2021.35						Sample 5	12.146	234.103	12.1284	12.1284
150	2972.77						Sample 6	12.143	236.516	12.2475	12.2475
200	3888.87									Average value	11.7061
250	5194.7									SD	0.411268
Quercetin							Quercetin
Concentration(ng/μL)	Area							RT (min)	Area	Concentration(ng/μL)	Calculated concentration(μg/mL)
0	0						Sample 1	18.068	21.2381	2.18882	2.18882
5	48.5509						Sample 2	18.041	28.6752	2.72903	2.72903
20	278.241						Sample 3	18.059	24.8293	2.44967	2.44967
50	705.53						Sample 4	18.059	21.0445	2.17475	2.17475
100	1375.05						Sample 5	18.043	34.0462	3.11917	3.11917
150	2023.35						Sample 6	18.032	33.3666	3.0698	3.0698
200	2641.09									Average value	2.62187
250	3526.41									SD	0.418697
Kaempferol							Kaempferol
Concentration(ng/μL)	Area							RT (min)	Area	Concentration(ng/μL)	Calculated concentration(μg/mL)
0	0						Sample 1	-	-	-	-
5	66.519						Sample 2	-	-	-	-
20	367.264						Sample 3	-	-	-	-
50	931.43						Sample 4	-	-	-	-
100	1813.54						Sample 5	-	-	-	-
150	2666.85						Sample 6	-	-	-	-
200	3478.85									Average value	-
250	4652.06									SD	-

## Sheet: S3
Supplementary table 2 RSJ components detected by using high performance liquid chromatography tandem mass spectrometry
Number	Name	Formula	Molecular Weight	RT [min]	Area	mzCloud score	Classification
1	Citric acid	C6H8O7	132.006	0.946	5970000000	99.3	Organic acid
2	Ascorbic acid	C6H8O6	176.032	0.89	1990000000	91.2	Organic acid
3	Fumaric acid	C4H4O4	116.011	0.894	672000000	94.6	Organic acid
4	DL-Malic acid	C4H6O5	134.021	0.897	611000000	99.7	Organic acid
5	(3β,5ξ,9ξ)-3,6,19-Trihydroxyurs-12-en-28-oic acid	C30H48O5	488.35	7.362	293000000	90	Organic acid
6	Arachidic acid	C20H40O2	329.329	9.771	280000000	94	Organic acid
7	4-Coumaric acid	C9H8O3	164.047	4.635	267000000	99.7	Organic acid
8	Maleic acid	C4H4O4	116.011	1.054	210000000	97.5	Organic acid
9	Pipecolic acid	C6H11NO2	147.089	0.893	89711176	97.4	Organic acid
10	8-Hydroxy-4a,8-dimethyldecahydro-2-naphthalenyl-2-acrylic acid	C15H24O3	234.162	10.407	38874537	98.3	Organic acid
11	Palmitic acid	C16H32O2	273.267	8.335	36790017	97	Organic acid
12	(±)-Abscisic acid	C15H20O4	264.136	7.076	28860814	96.7	Organic acid
13	L-(-)-Malic acid	C4H6O5	134.021	1.963	21892903	90.7	Organic acid
14	3-Hydroxy-3-(methoxycarbonyl) pentanedioic acid	C7H10O7	206.043	2.012	21050967	97.8	Organic acid
15	Stearic acid	C18H36O2	284.271	11.283	20221488	97.7	Organic acid
16	4-acetyl-4-(ethoxycarbonyl) heptanedioic acid	C12H18O7	296.087	5.536	14129801	98.5	Organic acid
17	2-hydroxy-4-methoxy-3-(3-methylbut-2-en-1-yl)-6-(2-phenylethyl)benzoic acid	C21H24O4	322.154	9.549	11846196	95.2	Organic acid
18	3-Hydroxybenzoic acid	C7H6O3	138.032	4.227	11282623	94.9	Organic acid
19	(2α,3β,19α)-2,3,19-Trihydroxyolean-12-en-28-oic acid	C30H48O5	488.35	9.418	7239069	93.3	Organic acid
20	2-Hydroxycaproic acid	C6H12O3	132.079	6.261	7172883	99	Organic acid
21	3-[4-(beta-D-Glucopyranosyloxy)-6-methoxy-1-benzofuran-5-yl]propanoic acid	C18H22O10	420.103	8.542	1844290	97.8	Organic acid
22	D-Quinic acid	C7H12O6	192.063	0.847	2390000000	99.6	Polyphenols
23	Catechin	C15H14O6	290.079	4.577	1700000000	94.6	Polyphenols
24	Neochlorogenic acid	C16H18O9	354.095	3.751	128000000	96.3	Polyphenols
25	Chlorogenic acid	C16H18O9	354.095	4.495	95392388	99.6	Polyphenols
26	7-Methoxy-5,3',4'-trihydroxyflavanone	C16H14O6	302.079	7.129	19156682	90.3	Polyphenols
27	Caffeic acid	C9H8O4	180.042	3.985	14084373	98.8	Polyphenols
28	Ellagic acid	C14H6O8	302.006	5.593	10749316	98.7	Polyphenols
29	Gallic acid	C7H6O5	170.022	1.867	4900866	98.3	Polyphenols
30	Quercetin	C15H10O7	302.043	7.136	4068735	95.4	Polyphenols
31	Hesperetin	C16H14O6	302.082	7.25	2525127	99.5	Polyphenols
32	α, α-Trehalose	C12H22O11	342.116	0.826	3590000000	98.5	Carbohydrate
33	1-O-[(2α,3β,5ξ,9ξ,18ξ,19α)-2,3,19,23-Tetrahydroxy-28-oxoolean-12-en-28-yl]-β-D-glucopyranose	C36H58O11	712.404	6.597	38983836	94.9	Carbohydrate
34	1-O-(3,4,5-Trimethoxybenzoyl)-beta-L-galactopyranose	C16H22O10	352.137	4.906	25066989	97.7	Carbohydrate
35	D-Glucose	C6H12O6	120.042	5.594	13384980	94.6	Carbohydrate
36	3-Hydroxy-3,5,5-trimethyl-4-(3-oxo-1-buten-1-ylidene)cyclohexylβ-D-glucopyranoside	C19H30O8	386.194	5.081	864000000	98.2	Glycosides
37	Quercetin-3β-D-glucoside	C21H20O12	464.096	5.83	28957269	98.3	Glycosides
38	4-Acetyl-3-hydroxy-5-methylphenylβ-D-glucopyranoside	C15H20O8	328.116	4.228	22240096	98.5	Glycosides
39	4-[4-(4-Hydroxy-3-methoxyphenyl)tetrahydro-1H,3H-furo[3,4-c]furan-1-yl]-2-methoxyphenylhexopyranoside	C26H32O11	520.194	6.045	10423458	96.3	Glycosides
40	Proline	C5H9NO2	98.0367	0.837	566000000	99.3	Amino acid
41	L-Glutamic acid	C5H9NO4	147.053	0.796	200000000	99.5	Amino acid
42	DL-Arginine	C6H14N4O2	174.112	0.724	56349478	95.9	Amino acid
43	DL-Tryptophan	C11H12N2O2	204.09	3.926	38196394	98	Amino acid
44	Isoleucine	C6H13NO2	131.095	1.399	21660902	99.6	Amino acid
45	L-Glutamine	C5H10N2O3	129.043	0.784	4556230	93	Amino acid
46	4-ethylbenzylidene-Bissorbitol	C24H30O6	414.204	9.504	191000000	99.3	Alcohols
47	3,4-Dihydroxybenzaldehyde	C7H6O3	138.032	4.577	92339932	98.8	Aldehydes
48	Citroflex	C20H34O8	402.225	11.217	59902415	98.8	Aldehydes
49	4-Hydroxybenzaldehyde	C7H6O2	122.037	4.572	50456055	96.8	Aldehydes
