# Supplementary material for: Component analysis and anti-pulmonary fibrosis effects of Rosa sterilis juice
Source: Royal Society of Chemistry journal article supplement (doi:10.1039/d2fo02758e), 2022-01-01
Supplement: d2fo02758e3.pdf [file d2fo02758e3.pdf]

## **Supplementary material : Experimental reagents and antibodies**

### **Standard samples**

Catechin, rutin, gallic acid, caffeic acid, astilbin, quercetin, kaempferol purchased from Chengdu

Desite Biological Technology Co., Ltd.

Ascorbic acid was purchased from J&K Scientific.

### **Reagents**

Folin-ciocalteu's phenol reagent was purchased from Beijing Solarbio Science & Technology Co.,

Ltd.

Sodium nitrite, aluminum nitrate, sodium carbonate purchased from ChengDu Chron Chemicals

Co., Ltd.

30 % hydrogen peroxide solution and sodium hydroxide purchased from Chengdu Jinshan Chemical

Reagent Co., Ltd.

Diphenyl-2-trinitrophenylhydrazine, 2,2' -biamino-3-ethylbenzothiazoline-6-sulfonic acid, sodium

acetate, potassium persulfate, ferrous sulfate, salicylic acid purchased from Shanghai Macklin

Biochemical Co., Ltd.

Bleomycin was purchased from Chengdu Saiengaide Technology Co., Ltd. (Chengdu, China);

Hydroxyproline (HYP) and GSH detection kit was purchased from Nanjing Jiancheng Institute of

Biological Engineering (Nanjing, China);

Fetal bovine serum (FBS) was purchased from Gibco (New York, USA);

Recombinant Human/Mouse/Rat TGF-beta1 was purchased from NovoProtein Nearby Protein

Technology Co., Ltd. (Shanghai, China);

ECL Advanced Western blot Detection Kit was purchased from 4A Biotech Co., Ltd. (Beijing,

---

China).

### **Antibodies**

Fluorescein (FITC)-conjugated Affinipure Goat Anti-Rabbit IgG (H+L) and Coralite594-conjugated coat Anti-Mouse IgG (H+L) purchased from Proteintech (Chicago, USA);

Mouse anti-beta-actin, goat anti-mouse/rabbit IgG/horseradish enzyme marker purchased from Beijing Zhongshan Jinqiao Biotechnology Co., Ltd. (Beijing, China);

Rabbit anti MMP-9, mouse anti Collagen I, rabbit anti  $\alpha$ -SMA mAb, mouse anti Vimentin, and mouse anti E-cadherin purchased from Abcam (Cambridge, UK);

Rabbit anti Smad2/3 and rabbit anti phosphorylated-Smad2/3 purchased from Cell Signaling Technology (Massachusetts, USA);

CD11b (PE), CD4 (PE), Gr-1 (FITC), F4/80 (PE), MHC II (APC), CD11c (PE), CD8a (FITC), CD69 (APC) purchased from eBioscience (California, USA).
